# Supplementary material
Source: publisher figshare collection journal article supplement (https://tandf.figshare.com/ndownloader/files/22715921)
Supplement: Supplementary file 1 [file 22715921]

## Supplementary figures

### Effect of rainfall variability and gauge representativeness on satellite rainfall accuracy in a small upland watershed in southern Ethiopia

Kassaw Beshaw Tessema, Alemseged Tamiru Haile, Negach Wagesho Amncho, and Emad Habib

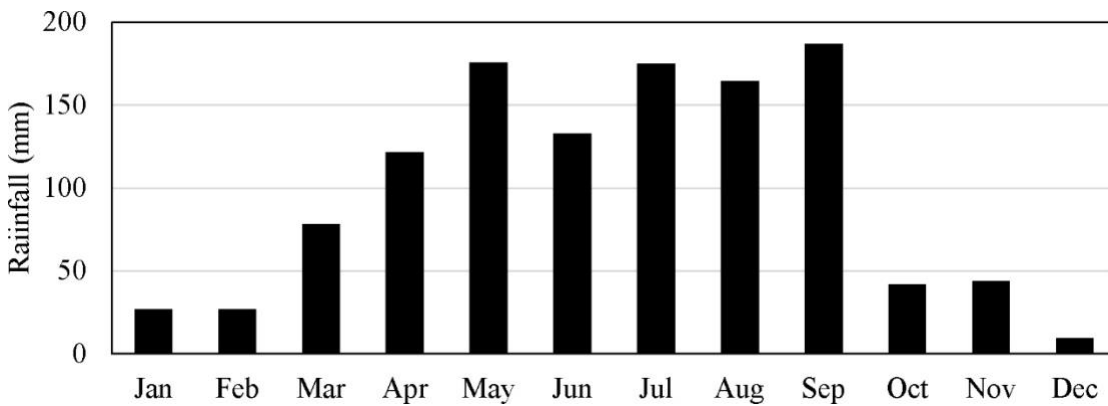

**Figure S1.** Monthly rainfall amount as measured by an AWS in the Upper Gana watershed. The data is the average of four years (2015, 2016, 2017, and 2018).

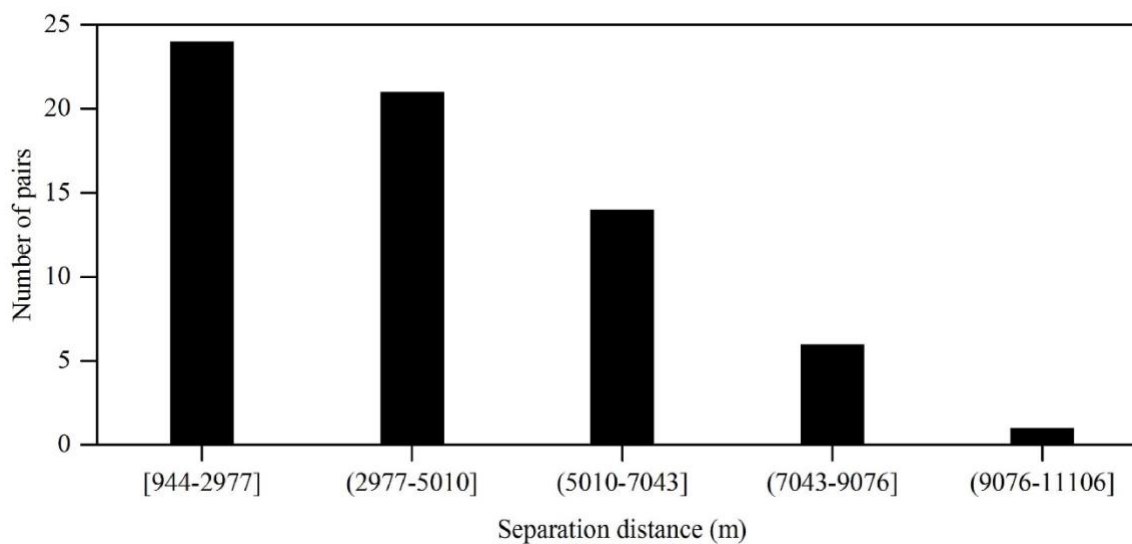

**Figure S2.** Simple histogram showing the number of raingauge pairs falling under different categories of separation distance.
